# Supplementary material for: Three Birds, One Excipient: Development of an Improved pH, Isotonic, and Buffered Ketamine Formulation for Subcutaneous Injection
Source: MDPI journal article supplement (doi:10.3390/pharmaceutics14030556), 2022-03-03
Supplement: s1 [file s1]

# Supplementary Materials: Three Birds, One Excipient: Development of an Improved pH, Isotonic, and Buffered Ketamine Formulation for Subcutaneous Injection

Jason Wallach\*, James Gamrat, Rebekah Jauhola-Straight, Jeffrey Becker and Thomas Eckrich

**Table S1.** Results from Fehling's test for stability of Captisol®: Glucose sensitivity test. N = 3.

| Sample                                   | Result       | Observation (20 minutes post-Fehling test)               |
|------------------------------------------|--------------|----------------------------------------------------------|
| Glucose (10 mg/mL)                       | Positive     | Yellow solution, red precipitate                         |
| Glucose (5 mg/mL)                        | Positive     | ~Colorless solution, red precipitate                     |
| Glucose (2 mg/mL)                        | Positive     | Mostly blue solution, red precipitate                    |
| Glucose (1 mg/mL)                        | Inconclusive | Blue solution, inconsistently produced a red precipitate |
| Glucose (0.75 mg/mL)                     | Inconclusive | Blue solution, inconsistently produced a red precipitate |
| Glucose (0.5 mg/mL)                      | Negative     | Blue solution unchanged                                  |
| 40% Captisol® (Negative control)         | Negative     | Blue solution unchanged                                  |
| HPLC H <sub>2</sub> O (Negative Control) | Negative     | Blue solution unchanged                                  |

**Table S2.** Results from Fehling's test for stability of Captisol®: CapAcid prepared from 15% Captisol®. N = 3. Results were evaluated at 20 minutes after Fehling's test. CapAcid concentration from the column solution was determined to be  $11.4 \pm 0.2$  % off the column (mean  $\pm$  SEM, N = 3), several dilutions of the CapAcid solution were also prepared.

| Sample                                      | Result<br>0 hr | Result<br>24 hr | Result<br>48 hr | Result<br>72 hr |
|---------------------------------------------|----------------|-----------------|-----------------|-----------------|
| 10 mg/mL Glucose<br>(Positive control)      | Positive       | Positive        | Positive        | Positive        |
| 2% Glucose (Positive<br>control)            | Positive       | Positive        | Positive        | Positive        |
| 40% Captisol®<br>(Negative control)         | Negative       | Negative        | Negative        | Negative        |
| HPLC H <sub>2</sub> O (Negative<br>control) | Negative       | Negative        | Negative        | Negative        |
| CapAcid<br>(11.4%)                          | Negative       | Negative        | Negative        | Negative        |
| CapAcid                                     | Negative       | Negative        | Negative        | Negative        |

(5.7%)

CapAcid  
(2.85%)

Negative

Negative

Negative

Negative

**Table S3.** Results from Fehling test for stability of Captisol®: CapAcid prepared from 20% Captisol®, N = 3. Results were 20 minutes after Fehling test. Mean concentration of CapAcid solution from the column was determined to be  $15.4 \pm 0.08$  % (mean  $\pm$  SEM, N = 3).

| Sample                                      | Result<br>0 hr | Result<br>24 hr | Result<br>48 hr | Result<br>168 hr |
|---------------------------------------------|----------------|-----------------|-----------------|------------------|
| 10 mg/mL Glucose<br>(Positive control)      | Positive       | Positive        | Positive        | Positive         |
| 2% Glucose (Positive<br>control)            | Positive       | Positive        | Positive        | Positive         |
| 40% Captisol®<br>(Negative control)         | Negative       | Negative        | Negative        | Negative         |
| HPLC H <sub>2</sub> O (Negative<br>control) | Negative       | Negative        | Negative        | Negative         |
| CapAcid<br>(15.4%)                          | Negative       | Negative        | Negative        | Positive         |

A. Fehling's Reagent Preparation

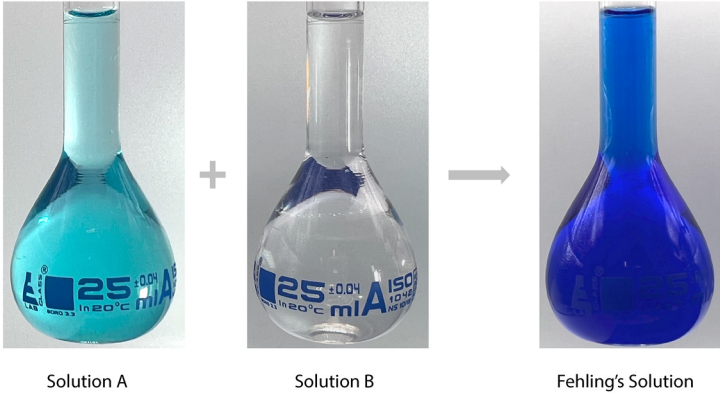

B. Fehling's Test Procedure

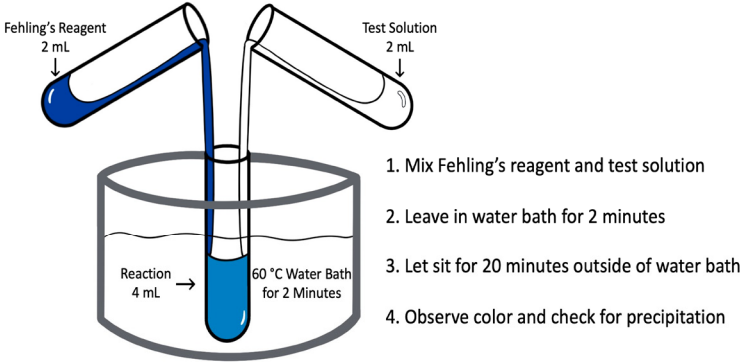

C. Reaction Scheme

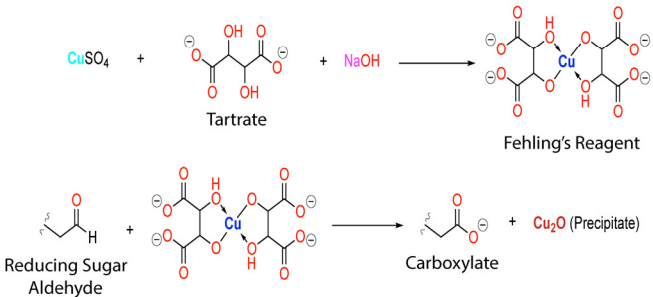

D. Representative Reactions

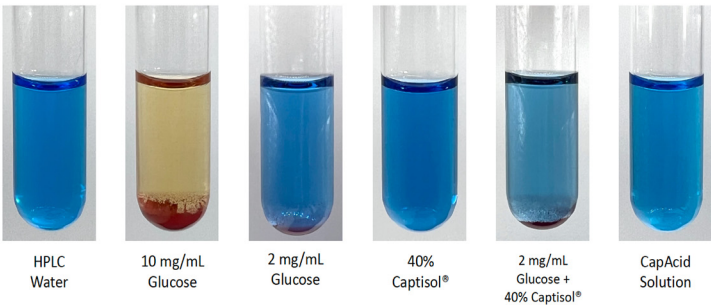

**Figure S1.** Fehling's Test.

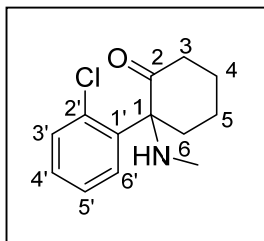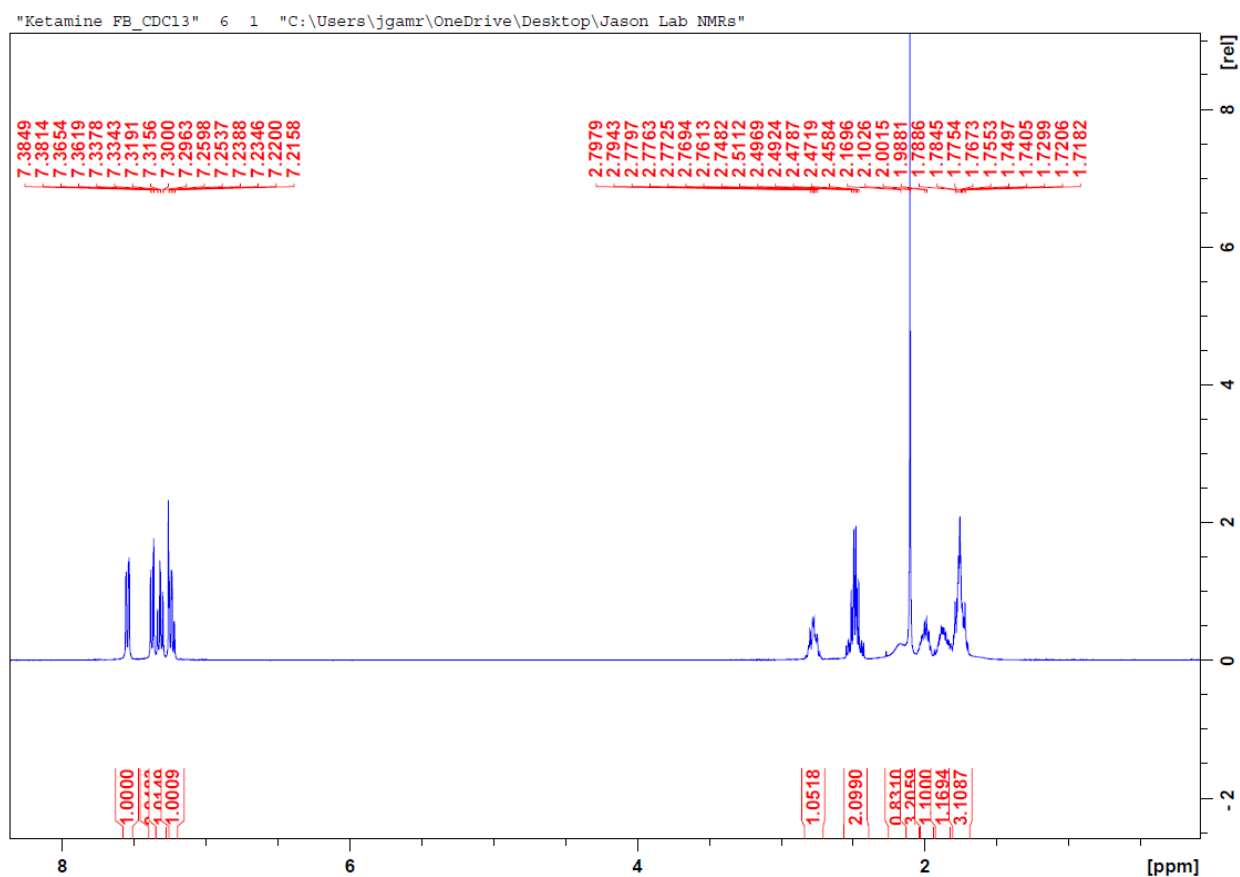

Figure S2a. <sup>1</sup>H NMR Spectrum of Ketamine Free Base. Compound dissolved at 20 mg/mL in CDCl<sub>3</sub>.

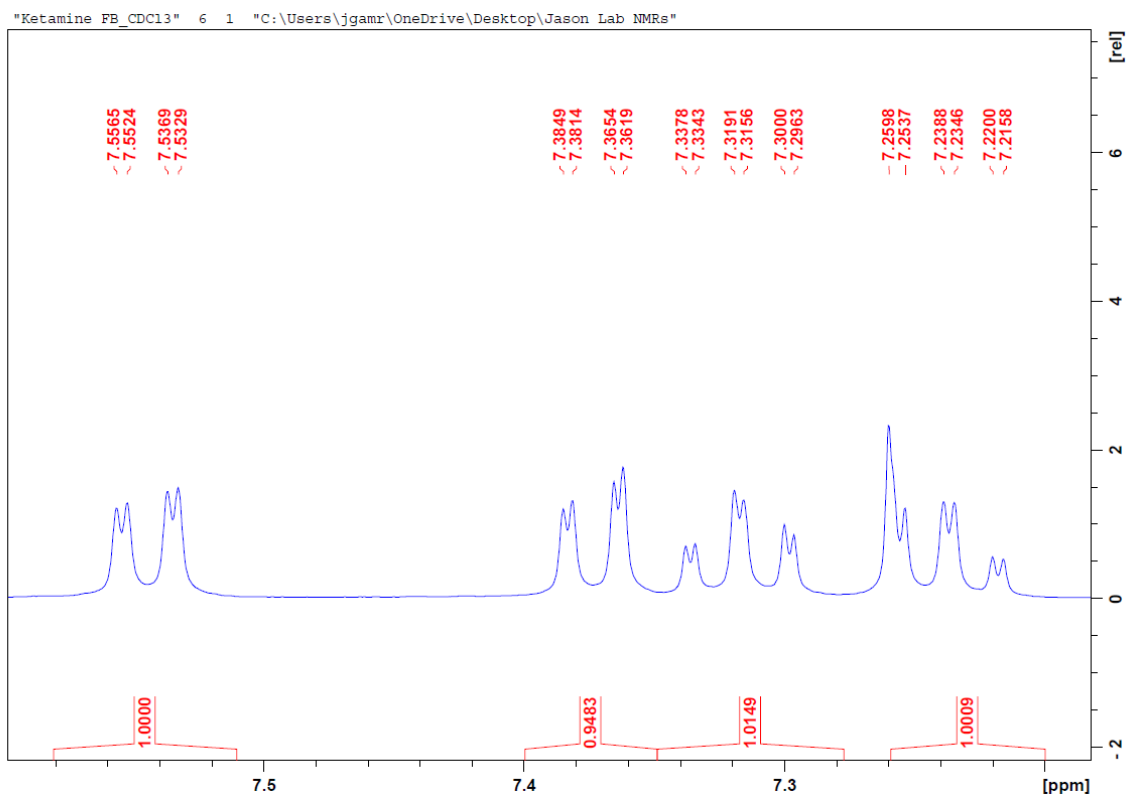

**Figure S2b.** Aromatic  $^1\text{H}$  NMR Spectrum of Ketamine Free Base. Compound dissolved at 20 mg/mL in  $\text{CDCl}_3$ .

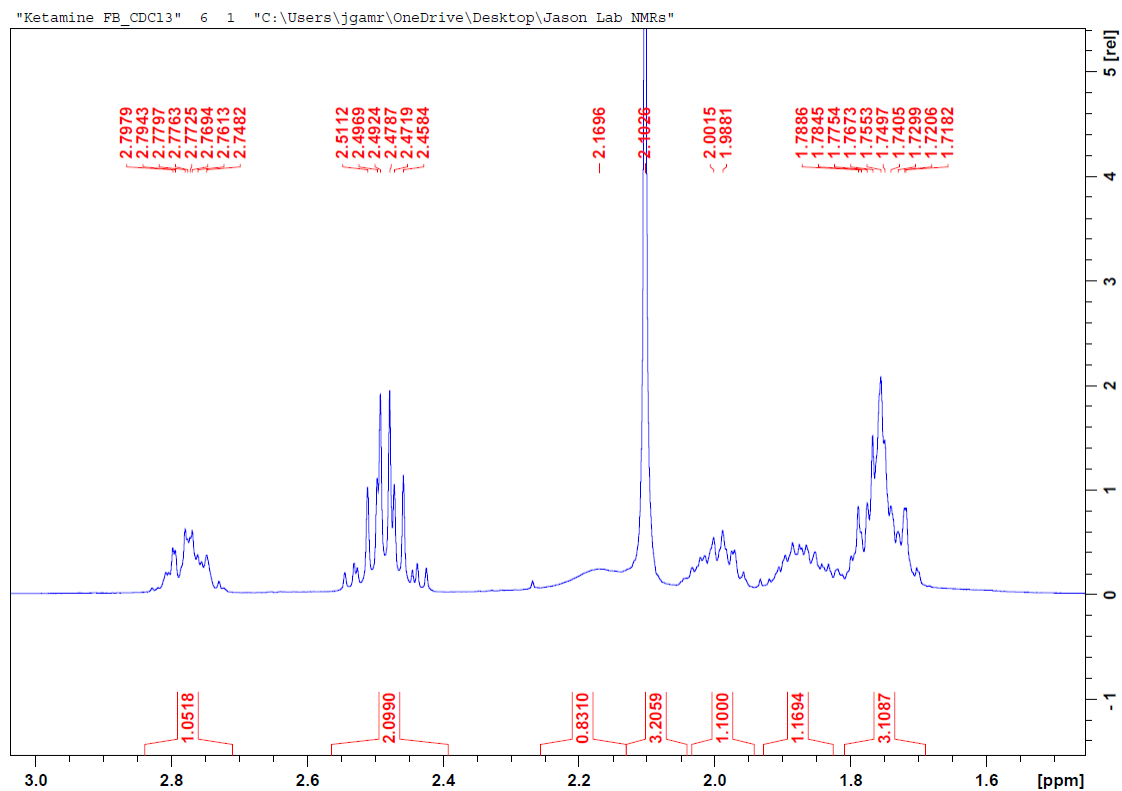

**Figure S2c.** Aliphatic  $^1\text{H}$  NMR Spectrum of Ketamine Free Base. Compound dissolved at 20 mg/mL in  $\text{CDCl}_3$ .

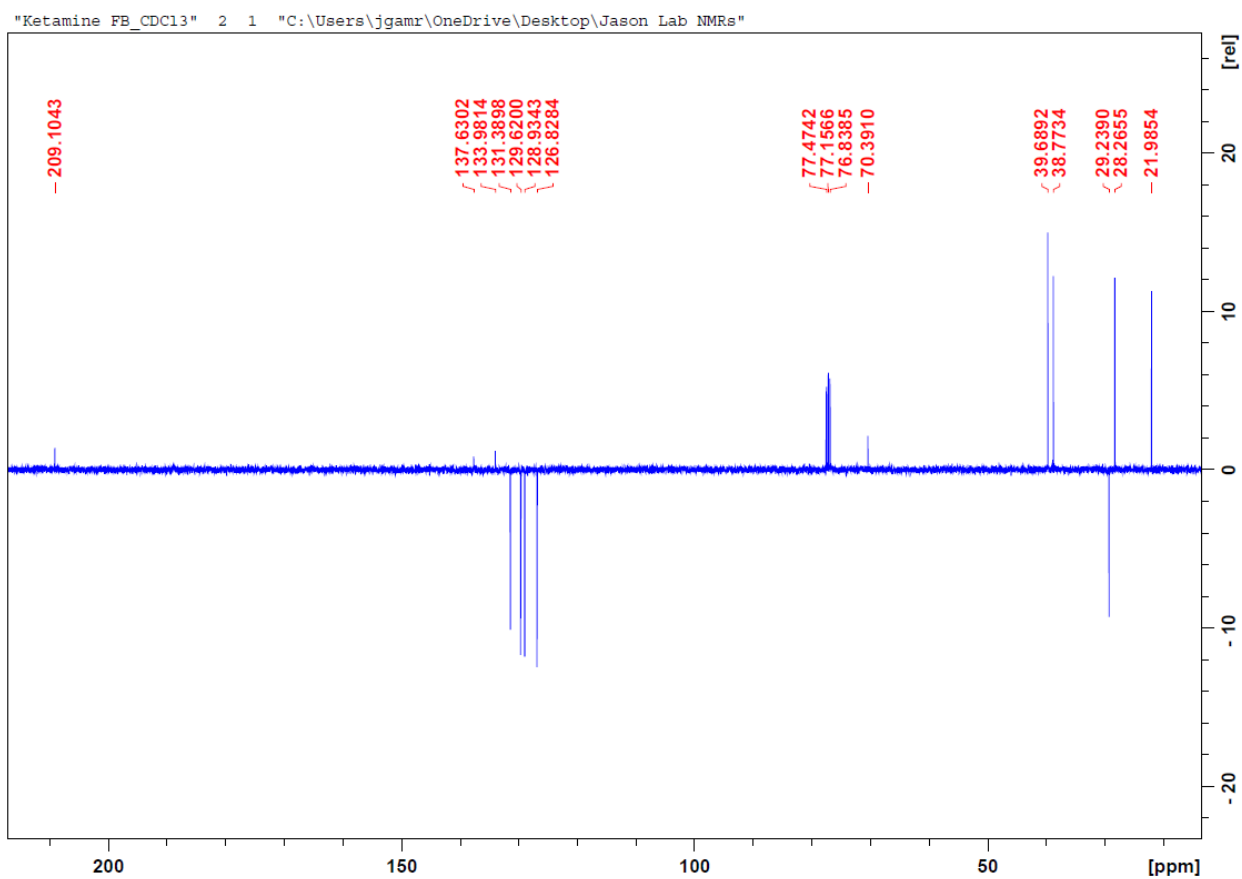

**Figure S3.**  $^{13}\text{C}$  NMR Spectrum of Ketamine Freebase. Compound dissolved at 20 mg/mL in  $\text{CDCl}_3$ .

## HPLC analyses

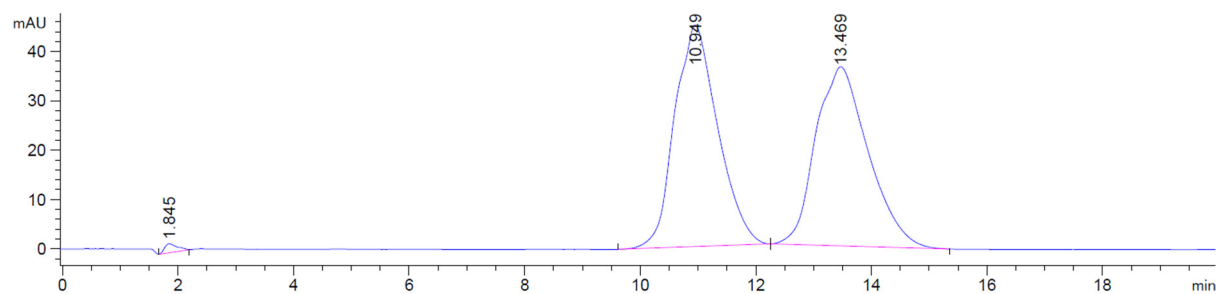

**Figure S4.** Chiral HPLC of Racemic Ketamine HCl (1 mg/mL).

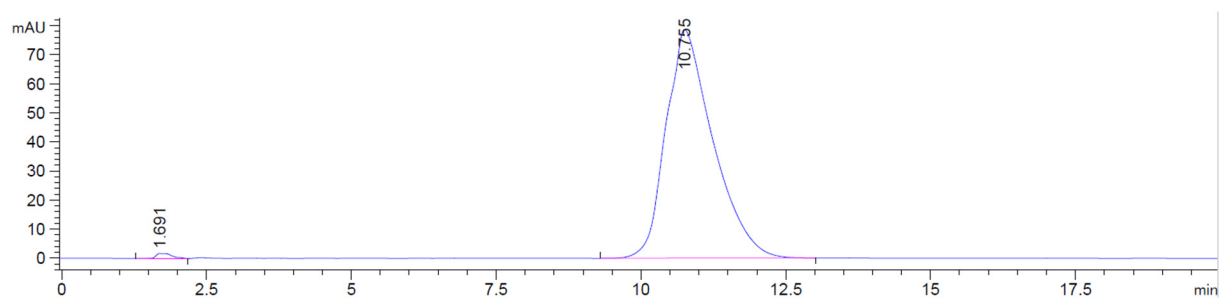

**Figure S5.** Chiral HPLC of S-Ketamine HCl (1 mg/mL).

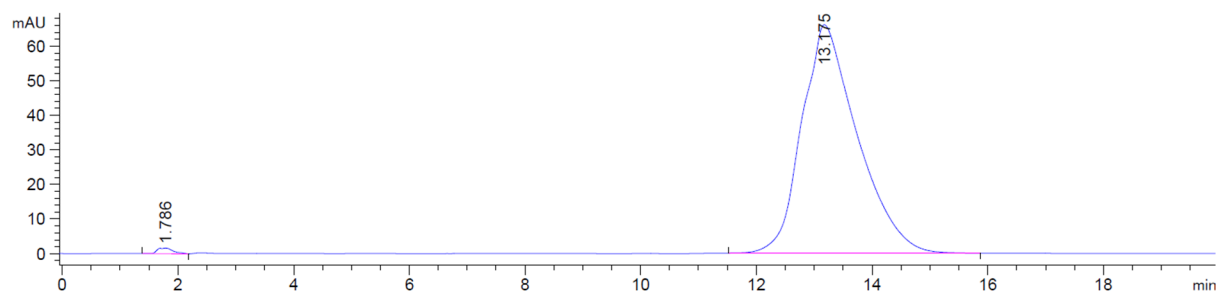

**Figure S6.** Chiral HPLC of R-Ketamine HCl (1 mg/mL).

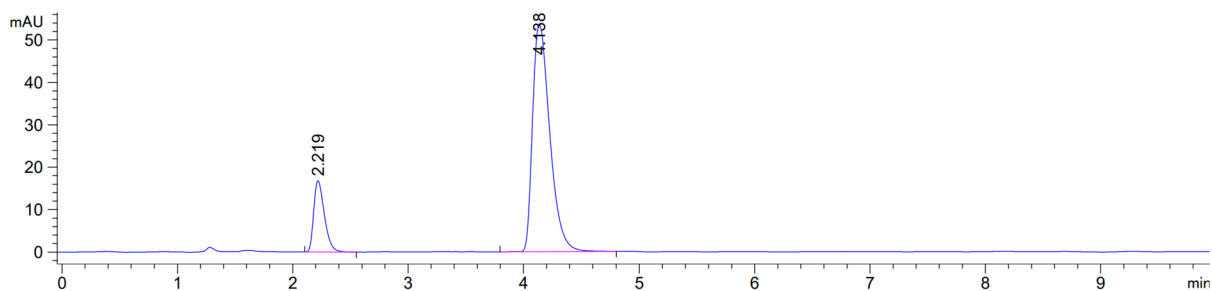

**Figure S7.** HPLC Trace of BB106; ketamine (4.138 min) with procaine HCl internal standard (2.219 min, 20 µg/mL).

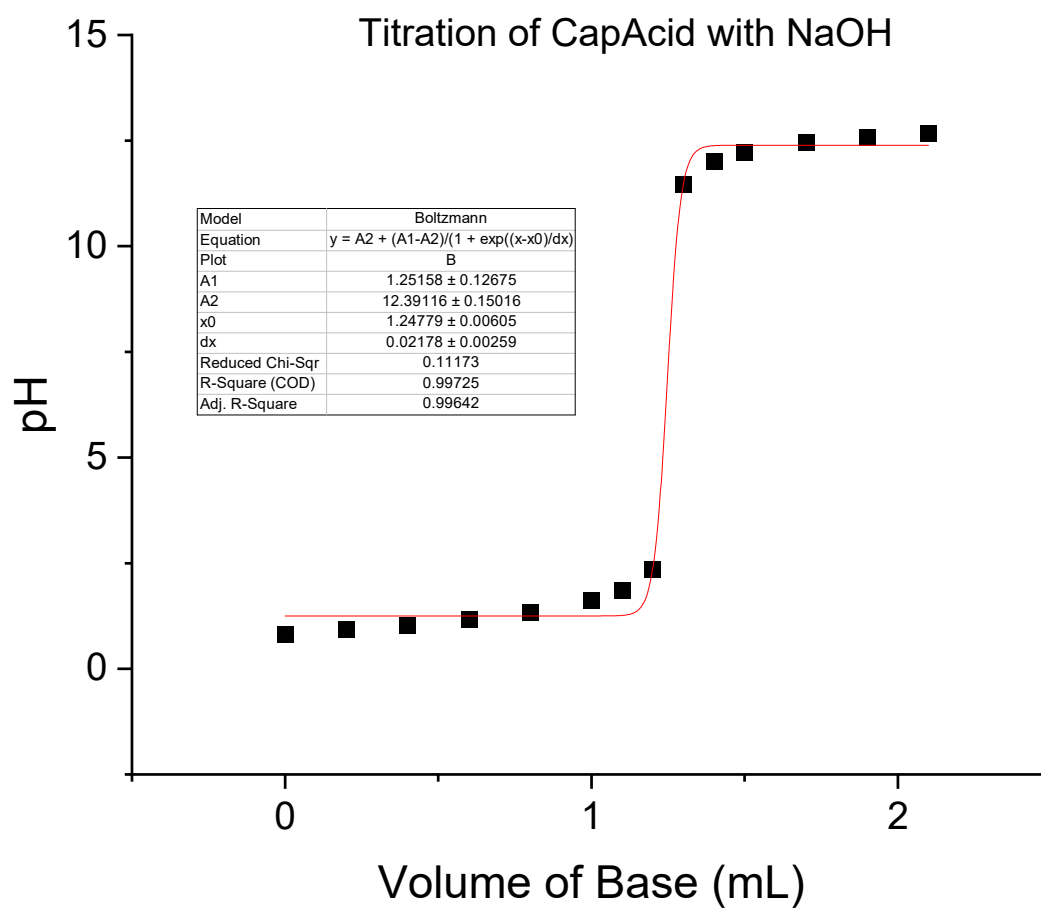

**Figure S8.** Titration of CapAcid with sodium hydroxide.

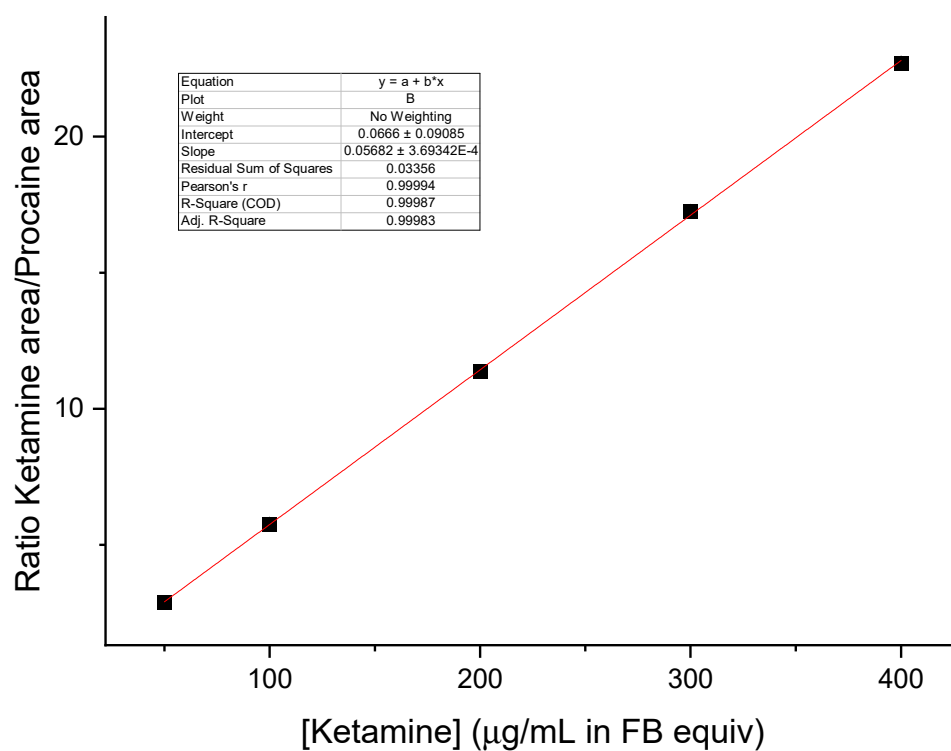

**Figure S9.** Representative Ketamine HPLC calibration curve.

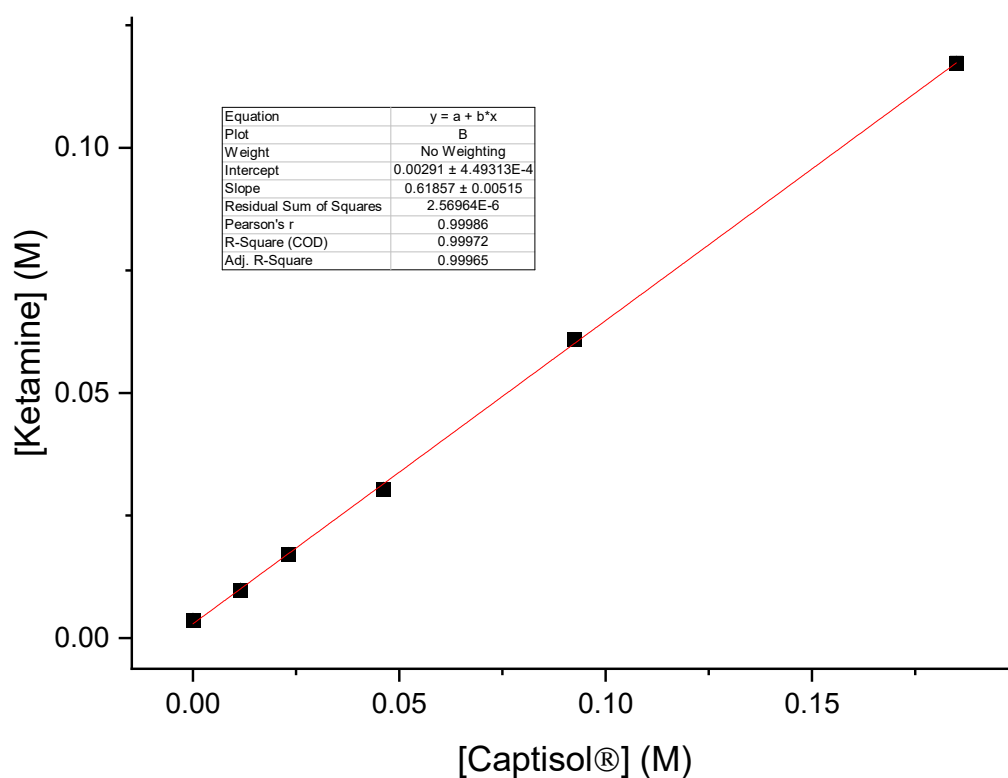

**Figure S10.** Ketamine Phase Solubility Curve with Captisol®.
